# Supplementary material for: Systematic review with network meta-analysis of randomized controlled trials of robotic-assisted arm training for improving activities of daily living and upper limb function after stroke
Source: J Neuroeng Rehabil. 2020 Jun 30;17:83. doi: 10.1186/s12984-020-00715-0 (PMC7325016; doi:10.1186/s12984-020-00715-0)
Supplement: Supplementary file 8 — Additional file 8. Forest plot of subgroups of studies with three different severities of arm paresis. [file 12984_2020_715_MOESM8_ESM.zip]

Archive with 3 entries (3 files):
- AF8a subgroup analysis UE-FM less than 20.pdf
- AF8b subgroup analysis UE-FM between 20 and 40.pdf
- AF8c subgroup analysis UE-FM more than 40.pdf
